# Supplementary material
Source: Research Square preprint supplement (doi:10.21203/rs.3.rs-9770163/v1)
Supplement: Supplementary file 1 [file 0ad2a8bade7a24ac6e2bd0a0.docx]

| Genetic determinant | Value |
| --- | --- |
| Prophage regions | 2 |
| Antibiotic resistance genes | 0 |
| Virulence genes | 0 |
| Plasmids | 0 |
| Probability of being a human pathogen | 0.0827 |
