# Supplementary material
Source: Research Square preprint supplement (doi:10.21203/rs.3.rs-9770163/v1)
Supplement: Supplementary file 2 [file 2db1e043e7060b3e3ff6eae1.docx]

| Gene | Annotation |
| --- | --- |
| group_111 | IS3 family transposase IS1223 |
| group_1428 | IS5 family transposase ISLrh3 |
| Int-Tn_1 | Transposase from transposon Tn916 |
| hsdS | Type-1 restriction enzyme EcoKI specificity protein |
| group_2118 | Putative sugar transferase EpsL |
| epsD | Putative glycosyltransferase EpsD |
| group_2120 | General stress protein 30 |
| group_2121 | Undecaprenyl-phosphate 4-deoxy-4-formamido-L-arabinose transferase |
| group_2123 | Undecaprenyl-phosphate 4-deoxy-4-formamido-L-arabinose transferase |
| arnC_6 | Undecaprenyl-phosphate 4-deoxy-4-formamido-L-arabinose transferase |
| yveL_2 | Putative tyrosine-protein kinase YveL |
| group_2127 | Putative capsular polysaccharide biosynthesis protein YwqC |
| repE | Replication initiation protein |
| group_2135 | IS3 family transposase IS1223 |
| recD2_3 | ATP-dependent RecD-like DNA helicase |
| group_807 | Oligopeptide-binding protein OppA |
| group_111 | Hypothetical protein |
| group_173 | Hypothetical protein |
| group_2063-2068 | Hypothetical protein |
| group_2087 | Hypothetical protein |
| group_2089-2091 | Hypothetical protein |
| group_2093 | Hypothetical protein |
| group_2094 | Hypothetical protein |
| group_2101-2105 | Hypothetical protein |
| group_2108 | Hypothetical protein |
| group_2115-2116 | Hypothetical protein |
| group_2120 | Hypothetical protein |
| group_2122 | Hypothetical protein |
| group_2124 | Hypothetical protein |
| group_2128-2132 | Hypothetical protein |
| group_2134 | Hypothetical protein |
| group_367 | Hypothetical protein |
| group_443 | Hypothetical protein |
| group_656 | Hypothetical protein |
| group_659 | Hypothetical protein |
| group_774 | Hypothetical protein |
| group_815 | Hypothetical protein |
