# Supplementary material
Source: Research Square preprint supplement (doi:10.21203/rs.3.rs-9770163/v1)
Supplement: Supplementary file 3 [file 7ed47f98e5c9c0084fe38800.docx]

| Strain | NCBI accession number |
| --- | --- |
| *Lacticaseibacillus rhamnosus* PMK4 | NONE |
| *Lacticaseibacillus rhamnosus* GG | ASM2650v1 |
| *Lacticaseibacillus rhamnosus* SL42 | ASM5036795v1 |
| *Lacticaseibacillus rhamnosus* GR-1 | ASM2466559v1 |
| *Lacticaseibacillus rhamnosus* VHProbi M12 | ASM3159377v1 |
| *Lacticaseibacillus rhamnosus* IDCC 3201 | ASM942906v1 |
| *Lacticaseibacillus rhamnosus* BFE5264 | ASM198893v1 |
| *Lacticaseibacillus rhamnosus* HN001 | ASM17325v3 |
| *Lacticaseibacillus rhamnosus* Pen | ASM207695v1 |
| *Lacticaseibacillus rhamnosus* LOCK900 | ASM41847v1 |
| *Lacticaseibacillus rhamnosus* KACC 92513P | ASM5190838v1 |
| *Lacticaseibacillus rhamnosus* TCI366 | ASM3985793v1 |
| *Lacticaseibacillus rhamnosus* L34 | ASM5472064v1 |
