# Supplementary material
Source: Research Square preprint supplement (doi:10.21203/rs.3.rs-9770163/v1)
Supplement: Supplementary file 4 [file b40879bded8a097637202312.docx]

| Query | Reference | ANI | Matches | Total |
| --- | --- | --- | --- | --- |
| *L. rhamnosus* PMK4*_*Cameroon | *L. rhamnosus* KACC 92513P_South Korea | 99.7969 | 935 | 964 |
| *L. rhamnosus* GR-1_Autriche | 99.7371 | 940 | 964 |
| *L. rhamnosus* SL42_ Algeria | 99.695 | 949 | 964 |
| *L. rhamnosus* LOCK900_ Poland | 97.6082 | 888 | 964 |
| *L. rhamnosus* Pen_Poland | 97.583 | 886 | 964 |
| *L. rhamnosus* TCI366_Taiwan | 97.5384 | 889 | 964 |
| *L. rhamnosus* VHProbi M12_China | 97.4006 | 858 | 964 |
| *L. rhamnosus* IDCC 3201_South Korea | 97.3994 | 867 | 964 |
| *L. rhamnosus* GG ATCC 53103_United States | 97.2808 | 847 | 964 |
| *L. rhamnosus* BFE5264_Kenya | 97.2669 | 857 | 964 |
| *L. rhamnosus* HN001_Mexico | 97.1854 | 869 | 964 |
| *L. rhamnosus* L34 Thailand | 96.9549 | 850 | 964 |
