# Supplementary material
Source: Research Square preprint supplement (doi:10.21203/rs.3.rs-9770163/v1)
Supplement: Supplementary file 5 [file bf76ee82a22d8fcf395376ea.docx]

| Antibiotic | Preparation of stock solutions | | | | Preparation of experimental solutions (1mL) | | |
| --- | --- | --- | --- | --- | --- | --- | --- |
| Mass (mg) | solvant (mL) | Water (mL) | Final  concentration  (mg/mL) | Stock solution  (µL) | Water (µL) | Final  concentration  (mg/L) |
| Ampicillin | 10 | 1 DMSO  (99.90%) | 9 | 1 | 64 | 936 | 64 |
| Erythromycin | 10 | 1 Alcool 70° | 9 | 1 | 16 | 984 | 16 |
| Kanamycin | 100 | / | 1 | 100 | 10,24 | 989,76 | 1024 |
| Streptomycin | 10 | / | 1 | 10 | 51,2 | 948,8 | 512 |
| Tetracyclin | 10 | / | 10 | 1 | 128 | 872 | 128 |
| Chloramphenicol | 10 | / | 10 | 1 | 64 | 936 | 64 |
| Clindamycin | 10 | / | 10 | 1 | 64 | 936 | 64 |
|  | 10 | / | 10 | 1 | 256 | 744 | 256 |
