# Supplementary material
Source: Research Square preprint supplement (doi:10.21203/rs.3.rs-9770163/v1)
Supplement: Supplementary file 6 [file c17f690d01364711077a37a6.docx]

| Types | Enzyme families | Number of genes |
| --- | --- | --- |
| Glycoside hydrolases (45) | GH13 | 8 |
| GH23 | 5 |
| GH1 | 3 |
| GH2 | 3 |
| GH4 | 3 |
| GH3 | 2 |
| GH24 | 2 |
| GH31 | 2 |
| GH37 | 2 |
| GH73 | 2 |
| GH109 | 2 |
| GH8 | 1 |
| GH18 | 1 |
| GH25 | 1 |
| GH38 | 1 |
| GH43 | 1 |
| GH63 | 1 |
| GH65 | 1 |
| GH77 | 1 |
| GH102 | 1 |
| GH103 | 1 |
| GH153 | 1 |
| Glycosytransferases (38) | GT2 | 10 |
| GT4 | 6 |
| GT9 | 4 |
| GT51 | 4 |
| GT8 | 2 |
| GT35 | 2 |
| GT5 | 1 |
| GT19 | 1 |
| GT20 | 1 |
| GT26 | 1 |
| GT28 | 1 |
| GT30 | 1 |
| GT35 | 1 |
| GT56 | 1 |
| GT73 | 1 |
| GT113 | 1 |
| Carbohydrate-binding modules (10) | CBM50 | 4 |
| CBM48 | 3 |
| CBM5 | 1 |
| CBM34 | 1 |
| CBM91 | 1 |
| Carbohydrate esterases (9) | CE1 | 2 |
| CE4 | 2 |
| CE9 | 2 |
| CE8 | 1 |
| CE11 | 1 |
| CE14 | 1 |
| Auxiliary activities (4) | AA1 | 1 |
| AA2 | 1 |
| AA3 | 1 |
| AA6 | 1 |
